# Supplementary material for: Triggering of Apoptosis in Osteosarcoma 143B Cell Line by Carbon Quantum Dots via the Mitochondrial Apoptotic Signal Pathway
Source: Hindawi journal article supplement (doi:10.1155/2020/2846297), 2020-01-01
Supplement: f1 [file 2846297.f1.pdf]

### Supplementary material

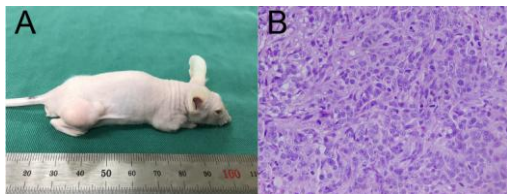

FIGURE S1. Murine xenograft model. (A) Tumor-bearing mice were established by subcutaneous injection 143B cells into the right flank region of male BALB/c nude mice. (B) H&E staining of xenograft tumor slices. Images were captured at 400x magnification.
